# Supplementary material
Source: MDPI journal article supplement (https://www.mdpi.com/2504-477X/7/10/423)
Supplement: s1 [file s1]

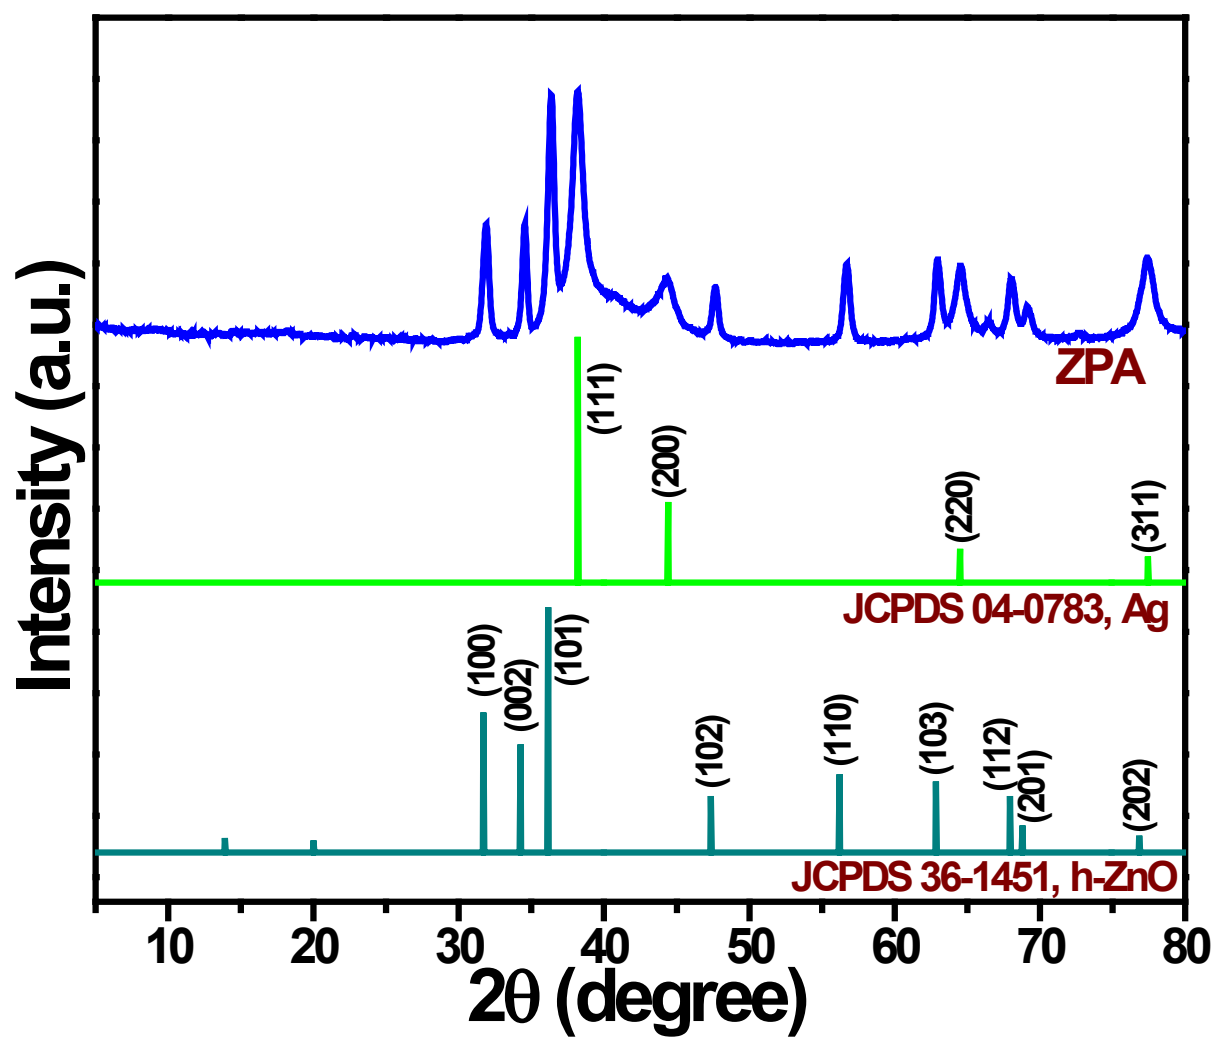

Figure S1. XRD pattern of ZPA sample synthesized from surfactant assisted approach.

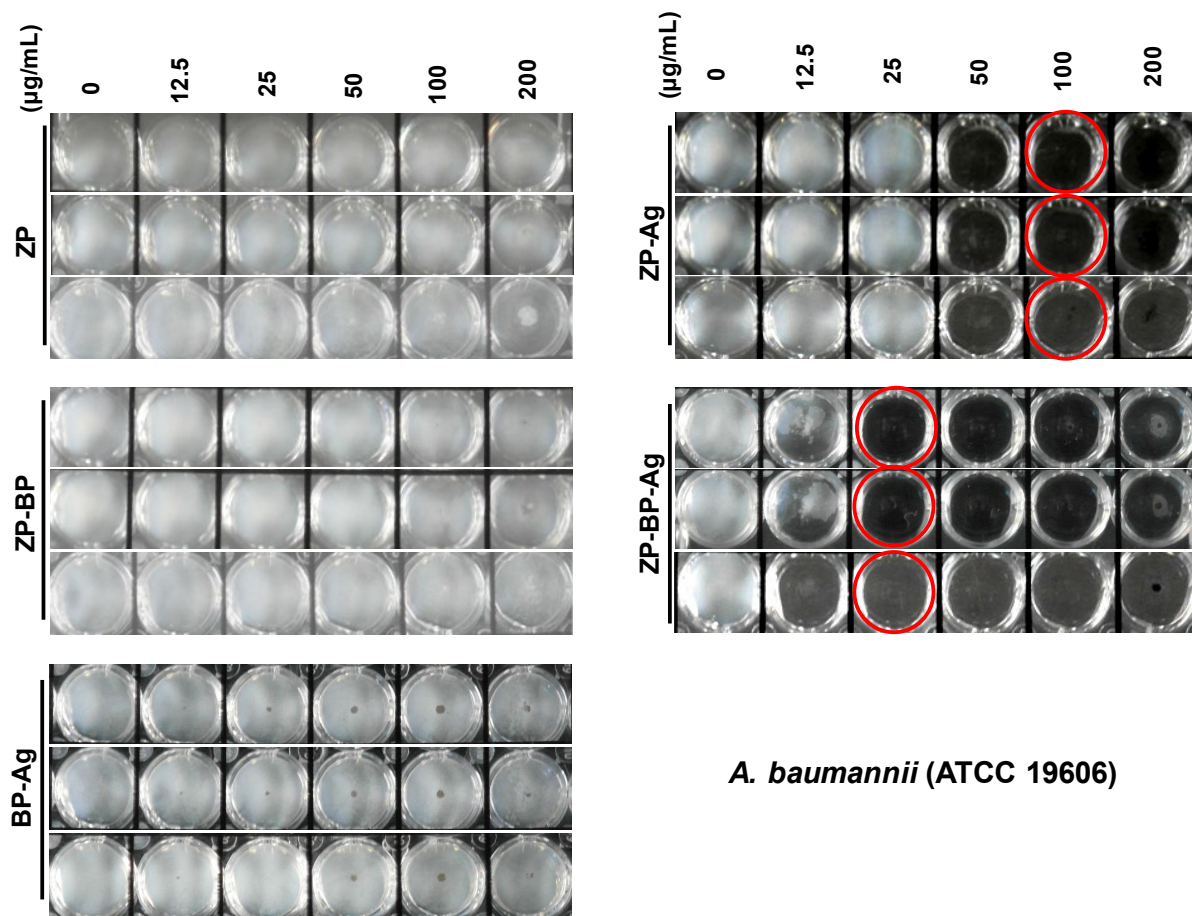

*A. baumannii* (ATCC 19606)

**Figure S2.** Minimum inhibitory concentrations (MICs) of ZP, ZP-BP (ZPB), ZP-Ag (ZPA), BP-Ag (BA) and ZP-BP-Ag (ZPBA) against *A. baumannii* (ATCC 19606). The MIC results from 96-well plates were photographed. Red circles indicate individual MIC values. Triplicate measurements are presented.

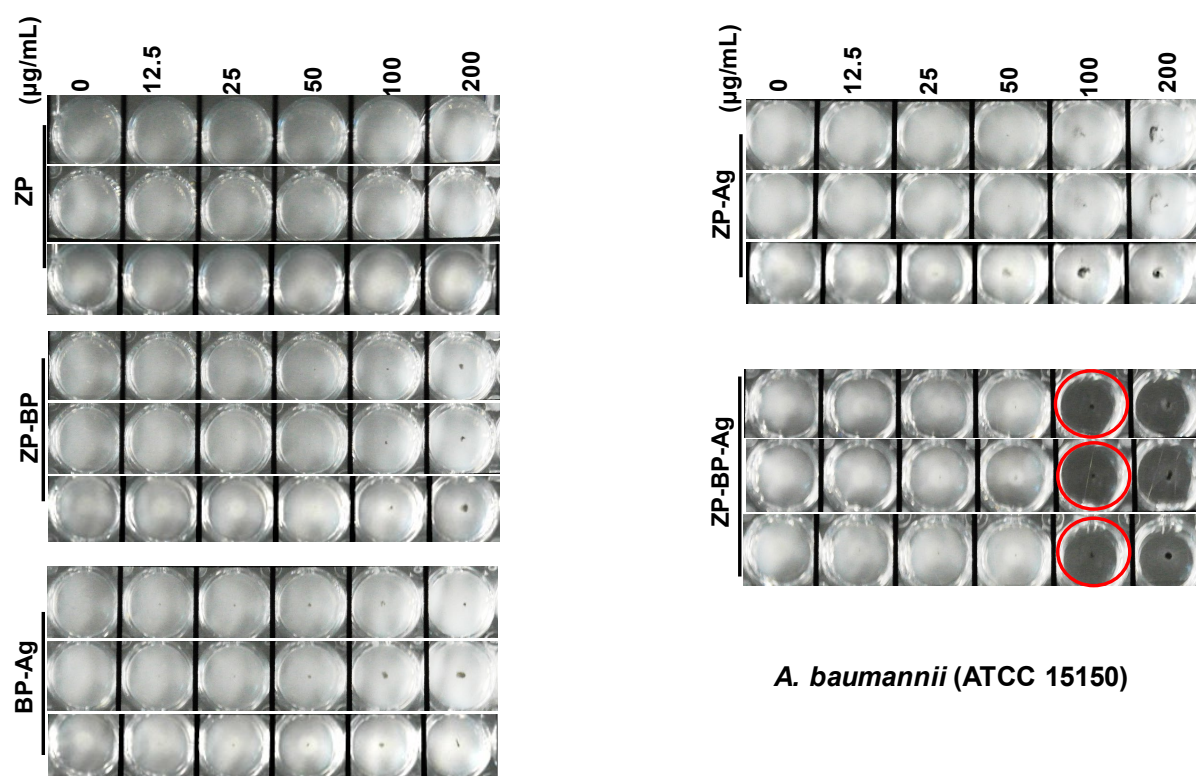

**Figure S3.** Minimum inhibitory concentrations (MICs) of ZP, ZP-BP (ZPB), ZP-Ag (ZPA), BP-Ag (BA) and ZP-BP-Ag (ZPBA) against *A. baumannii* (ATCC 15150). The MIC results from 96-well plates were photographed. Red circles indicate individual MIC values. Triplicate measurements are presented.

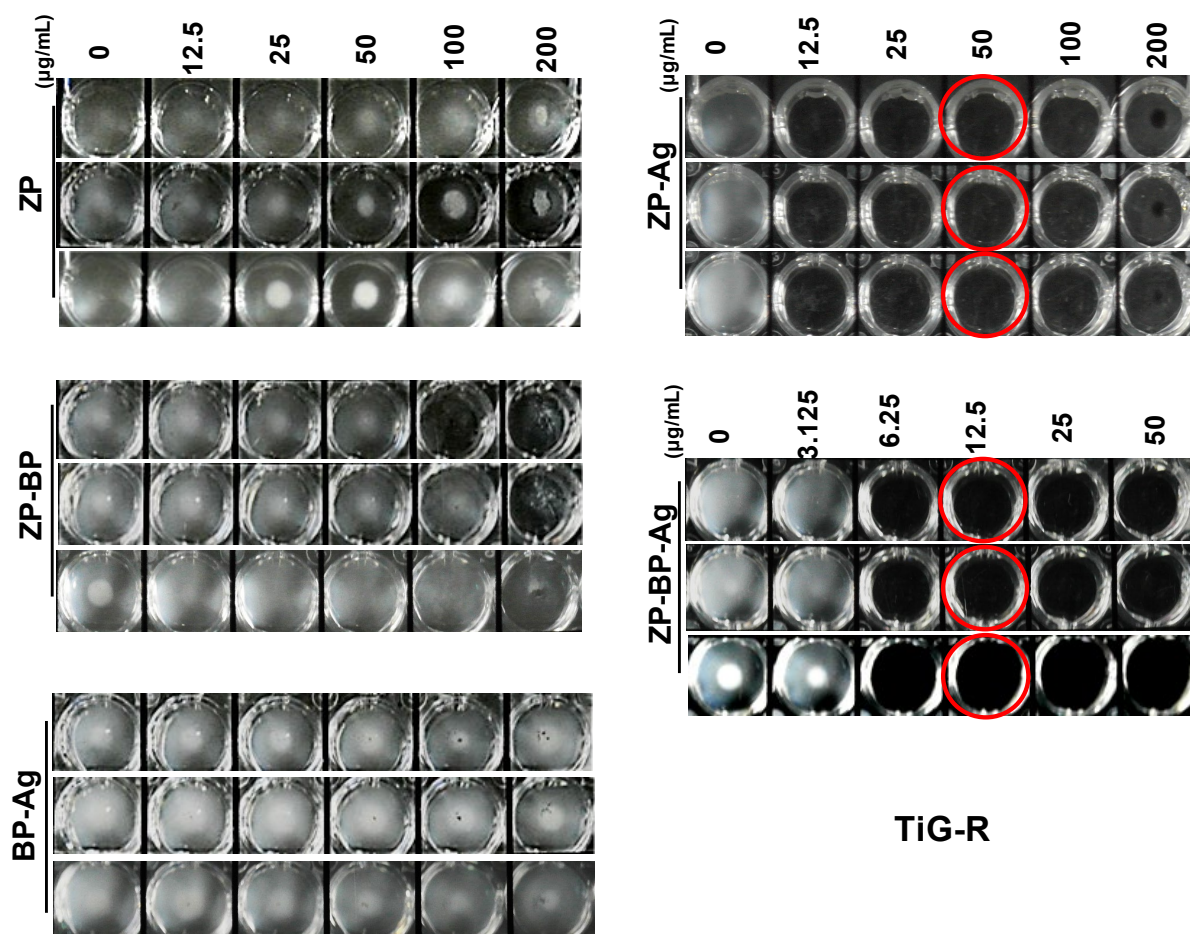

**Figure S4.** Minimum inhibitory concentrations (MICs) of ZP, ZP-BP (ZPB), ZP-Ag (ZPA), BP-Ag (BA) and ZP-BP-Ag (ZPBA) against TiG-R *A. baumannii*. The MIC results from 96-well plates were photographed. Red circles indicate individual MIC values. Triplicate measurements are presented.
